# Supplementary material
Source: MDPI journal article supplement (https://www.mdpi.com/2071-1050/12/9/3750)
Supplement: s1 [file s1]

## Sheet: Sheet1
Country	Population (a)	Population, 2018 (Mn) (a)	% Population employed in agriculture, 2018 (a)	% of agricultural holdings <1 Ha in area (b) (c)	% of agricultural holdings <1 Ha in area (b) (c)	Poverty rate among small farmers (%) (a) (e), *all rural	Avg size of agricultural holding (ha) (b) (c) (d) (e)	Gross Food Production Value, 2016 (current million USD) (f)	Agricultural land area, 2016 (1000 ha) (f)	Value of food production per hectare (USD per ha) (f) (b)	Value of food production per hectare (const. 2009 Int. USD) (b)	Crop production index, 2016 (2004-2006 = 100) (a)	Mobile cellular subscriptions, 2017 (per 100 people) (a)	GNI, 2018 (current millions USD) (a)	GNI per capita, 2018 (current millions USD) (a)	GNI per capita, PPP (current international USD) (a)	PPP conversion factor, private consumption (LCU per international USD) (a)	Price of 1GB broadband data (LCU) (g)	Price of 1GB broadband data (USD PPP) (g)	Price of 1GB mobile data as a % of GNI per capita PPP (a) (g)	Price of Broadband Data (1GB mobile prepaid) as % of GNI per capita 2017 (i)	Smartphone penetration (% of Popn.) (h)	Individuals using the Internet, 2017 (% of population) (a)
Bangladesh	161356039	161.356	40.15	0.842374	84% (2005)	43	0.54 (2005)	21579.3	9194.21	2347.05	2245 (2005)	146.4	92	286521	1775.71	4560	34	82.85	2.43676	0.641254	2.24	16.1	18
Ethiopia	109224559	109.225	66.203	0.628536	63% (2001)	67	1.4 (2012)	16839.2	36259	464.414	1831 (2012)	187.6	38	83805.9	767.28	2010	9.33	82.81	8.87567	5.29891	9.65	11.2	19
Ghana	29767108	29.7671	33.862			56	2.56 (2013)	3796.4	15700	241.809	377 (2013)	154.3	127	64270.2	2159.1	4650	1.66	8.2	4.93976	1.27478	3.56	24	38
Guatemala	17247807	17.2478	29.255	0.784744	78% (2003)	75	0.94 (2006)		3856	1156	1156 (2006)	165.9	118	77149.8	4473.02	8310	4.5	35.17	7.81556	1.1286	3.93	55	41
Honduras	9587522	9.58752	31.911			63	11.2 (1990)	2219.97	3235	686.234		132.3	89	22203.1	2315.84	4780	12.18	5.02	0.412151	0.103469	8.97	28	32
Kenya	51393010	51.393	57.454			49	0.86 (2005)	10910.9	27630	394.894	734 (2005)	129	86	87180.2	1696.34	3430	50.25	273.98	5.45234	1.90752	4.01	20,9	18
Mali	19077690	19.0777	65.302	0.317434	32% (2005)	51*	3.3 (1980)	7314.6	41201	177.534		193.4	119	16615.9	870.959	2230	217.99	5346.67	24.5271	13.1985	21.04	27	13
Nepal	28087871	28.0879	70.1	0.749461	75% (2002)	35	0.7 (2003)	8433.58	4121	2046.49	2536 (2003)	139.4	123	29044.2	1034.05	3090	37.18	256.53	6.89968	2.67949	4.41	50	21
Niger	22442948	22.4429	75.905			53	4.57 (2011)	6253.23	45682	136.886	262 (2011)	235.7	41	9040.14	402.805	1030	223.17	1691.59	7.57983	8.83087	3.31	25	10
Nigeria	195874740	195.875	36.616			44	0.85 (2013)	30540.8	70800	431.368	2870 (2013)	118.9	76	378946	1934.63	5700	154.35	806.05	5.22222	1.09942	1.59	13	28
Senegal	15854360	15.8544	32.03	0.209438	21% (1999)	57	4.3 (2000)	1159.62	8868	130.765		155.5	99	23435.3	1478.16	3670	228.89	1904.54	8.32077	2.72069	5.23	19	30
Uganda	42723139	42.7231	70.76	0.492379	49% (1991)	27	1.51 (2012)		14415	972	972 (2012)	81.6	58	26607.7	622.792	1970	1245.36	17256.9	13.8569	8.44078	1.62	15.6	24
India	1352617328	1352.62	43.86	0.628805	63% (2001)	26	1.3 (2000)	340462	179721	1894.39		142.8	87	2.69862e+06	1995.11	7680	20.65	18.5	0.895884	0.139982	1.53	27.7	34
China	1392730000	1392.73	26.77	0.92996	93% (1997)	7*	0.6 (2011)	1.18129e+06	528532	2235.04		144.2	104	1.35568e+07	9734.01	18140	3.81	66.91	17.5617	1.16174	2.68	55.3	54
United States	327167434	327.167	1.423			17*	179 (2018)	320437	405862	789.52		122.2	121	20738399	63387.7	63390	1	12.37	12.37	0.234169		77	75
World	7594270356	7594.27	28.2663					3.59606e+06	4.87316e+06	737.933		128.1	103	8.5805e+07	11298.6	17904							49
South Asia	1814388744	1814.39	43.5571					470301	317011	1483.55		141.1	87	3.45644e+06	1905.01	7068							30
Least developed countries (UN classification)	1009662578	1009.66	56.976					132116	785467	168.2		144.1	67	1.04285e+06	1032.87	2941							18
OECD members	1303529456	1303.53	4.55367									110.2	118	5.29566e+07	40625.6	46147							79
Sub-Saharan Africa	1078306520	1078.31	54.6616									135.4	72	1.64003e+06	1520.93	3828							22
Latin America & Carribean	641357515	641.358	14.0108									134.7	107	5.60524e+06	8739.64	16111							62
Low income	705417321	705.417	62.8949									135.2	57	563585	798.938	2225							15
Middle income	5678540888	5678.54	30.2608									133.8	104	3.07862e+07	5421.49	12814							45
High income	1210312147	1210.31	2.97119									109.3	125	5.44861e+07	45018.2	51175							82
(a) World Bank Data, data.worldbank.org
(b) Food and Agriculture Organization of the United Nations, Family Farming Knowledge Platform, www.fao.org/family-farming/data-sources/dataportrait
(c) Lowder, S., et al. (2016), “The Number, Size, and Distribution of Farms, Smallholder Farms, and Family Farms Worldwide”, World Development, 87, pp-16-29
(d) The Wall Street Journal, "Agriculture Journal: China Versus India by the Numbers", https://blogs.wsj.com/indiarealtime/2011/09/20/agriculture-journal-china-versus-india-by-the-numbers/
(e) United States Department of Agricuture, "Farms and Land in Farms 2018 Summary", https://www.ers.usda.gov/data-products/ag-and-food-statistics-charting-the-essentials/farming-and-farm-income/
(f) FAOSTAT, http://www.fao.org/faostat
(g) Cable.co.uk, Worldwide mobile data pricing: The cost of 1GB of mobile data in 230 countries, https://www.cable.co.uk/mobiles/worldwide-data-pricing/
(h) Newzoo, "Top 50 Countries/Markets by Smartphone Users and Penetration", https://newzoo.com/insights/rankings/top-50-countries-by-smartphone-penetration-and-users/
Guatemala/2 Smartphone penetration - https://www.gsmaintelligence.com/research/?file=e14ff2512ee244415366a89471bcd3e1&download
Honduras/6 Smartphone pentration - https://www.gsma.com/publicpolicy/wp-content/uploads/2016/03/GSMA2016_Report_DigitalInclusionAndMobileSectorTaxationInHonduras_English.pdf
Mali/3 approximate Smartphone penetration - https://www.gsmaintelligence.com/research/?file=7bf3592e6d750144e58d9dcfac6adfab&download
Nepal/7 approximate Smartphone penetration - https://www.nepalitelecom.com/2018/03/smartphone-penetration-nepal-and-the-impact.html
Niger/11 Smartphone penetration - https://www.gsmaintelligence.com/research/?file=e568fe9e710ec776d82c04e9f6760adb&download
(i) Alliance for Affordable Internet, "Mobile Broadband Data Costs", https://a4ai.org/mobile-broadband-pricing-data/
